# Supplementary material for: Sodium Salicylate Influences the Pseudomonas aeruginosa Biofilm Structure and Susceptibility Towards Silver
Source: MDPI journal article supplement (doi:10.3390/ijms22031060), 2021-01-21
Supplement: s1 [file s1]

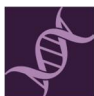

Supplemental Material

# Sodium Salicylate Influences the *Pseudomonas aeruginosa* Biofilm Structure and Susceptibility Towards Silver

Erik Gerner<sup>1,2,3,\*</sup>, Sofia Almqvist<sup>2</sup>, Peter Thomsen<sup>1</sup>, Maria Werthén<sup>1,3</sup>, and Margarita Trobos<sup>1,3,\*</sup>

<sup>1</sup> Department of Biomaterials, The Sahlgrenska Academy, University of Gothenburg, Gothenburg, Sweden; [erik.gerner@biomaterials.gu.se](mailto:erik.gerner@biomaterials.gu.se) (E.G.); [peter.thomsen@biomaterials.gu.se](mailto:peter.thomsen@biomaterials.gu.se) (P.T.); [werthenm@gmail.com](mailto:werthenm@gmail.com) (M.W.); [margarita.trobos@biomaterials.gu.se](mailto:margarita.trobos@biomaterials.gu.se) (M.T.)

<sup>2</sup> Mölnlycke Health Care AB, Gothenburg, Sweden; [sofia.almqvist@molnlycke.com](mailto:sofia.almqvist@molnlycke.com) (S.A.); [erik.gerner@molnlycke.com](mailto:erik.gerner@molnlycke.com) (E.G.)

<sup>3</sup> Center for Antibiotic Resistance Research (CARE) at University of Gothenburg, Gothenburg, Sweden

\* Correspondence: [margarita.trobos@biomaterials.gu.se](mailto:margarita.trobos@biomaterials.gu.se) (M.T.); [erik.gerner@biomaterials.gu.se](mailto:erik.gerner@biomaterials.gu.se) (E.G.)

Received: 10 December 2020; Accepted: 19 January 2021; Published: 21 January 2021

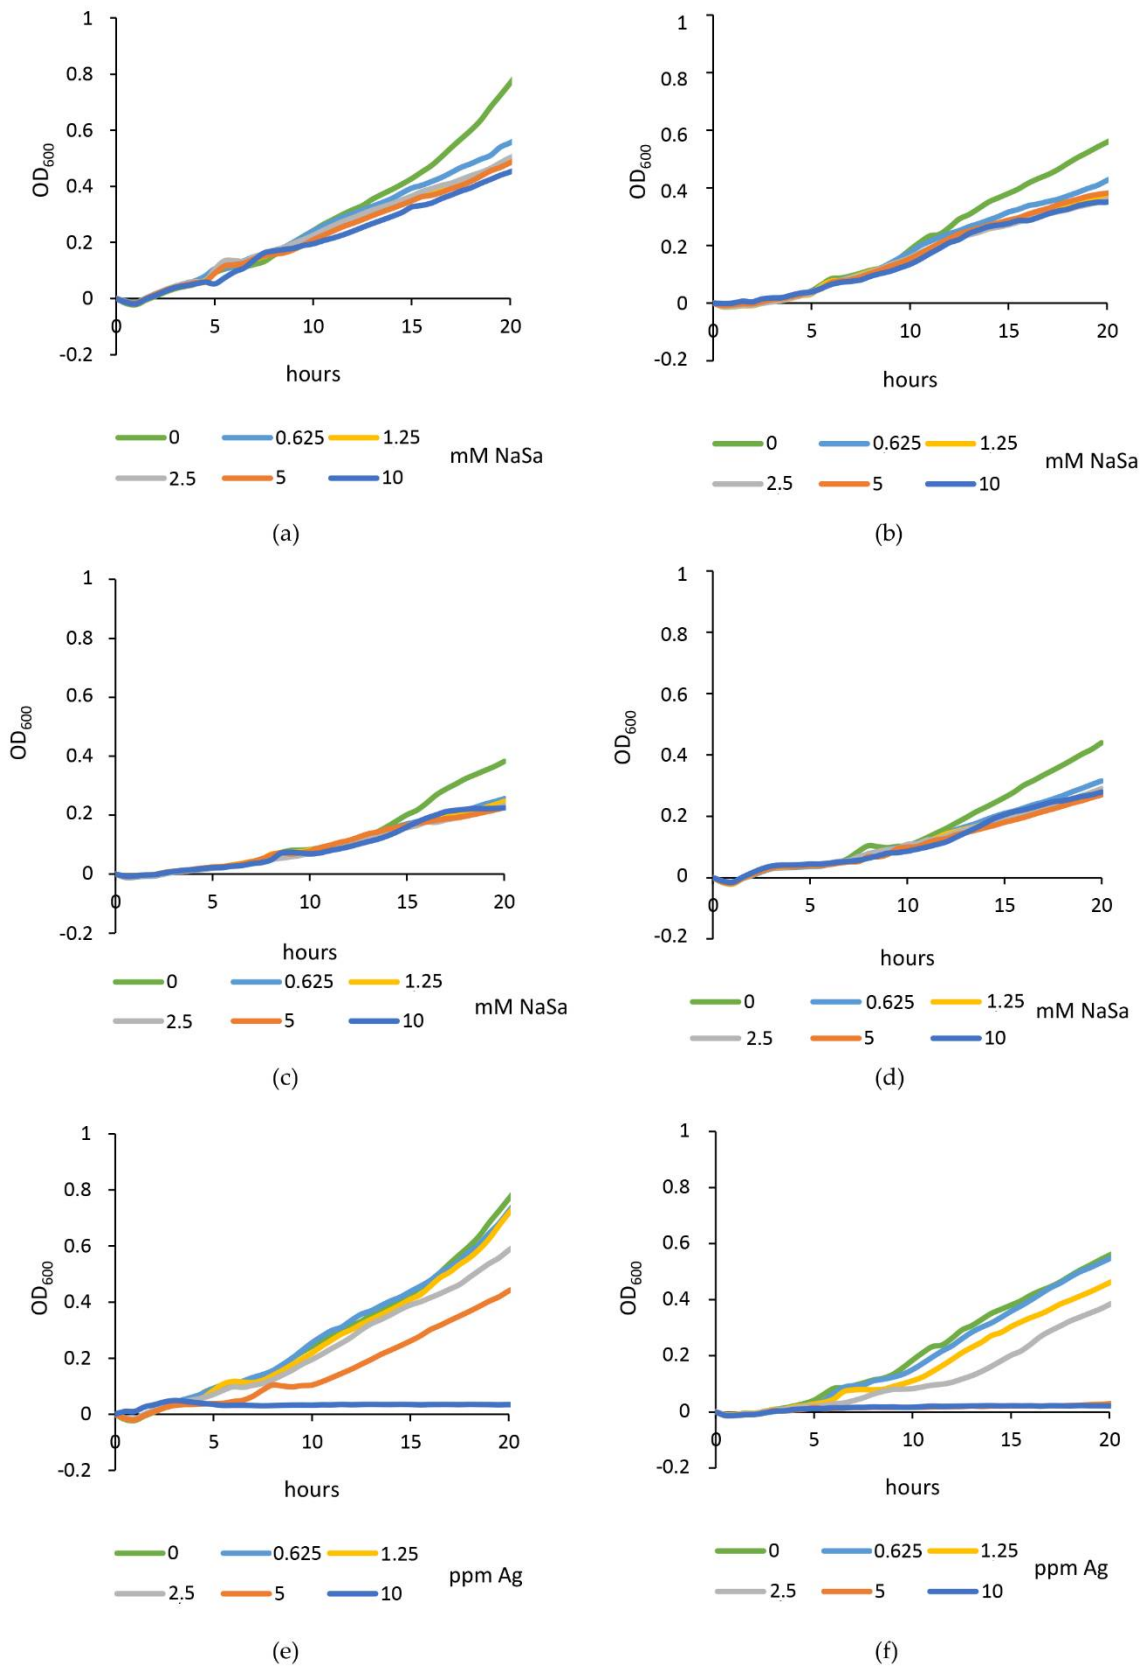

**Figure S1.** Growth curves of (a, c and e) PAO1 wt; and (b, d and f) PAO1 *lasR*  $\Delta$ *rhIR* cultured in simulated wound fluid in the presence of (a-b) 0-10 mM NaSa without Ag; 0-10 mM NaSa with (c) 5 or (d) 2.5 ppm Ag and (e-f) in 0-10 ppm Ag without the addition of NaSa. N = 3.

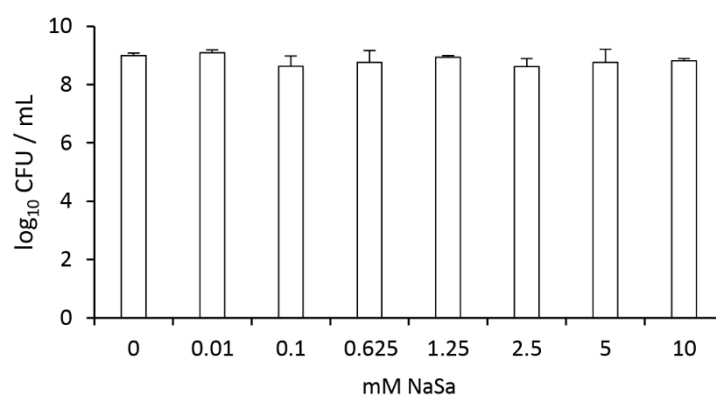

**Figure S2.** Silver (Ag) in combination with NaSa does not reduce the viability of planktonic cultures of *P. aeruginosa*. Viability, measured as colony-forming units (CFUs), of PAO1-wt exposed to 6 ppm silver and NaSa (0-10 mM) in simulated wound fluid for 20 h. At 7 ppm Ag, total killing in both the control and across all NaSa concentrations was observed. Mean  $\pm$  SD, n = 3.

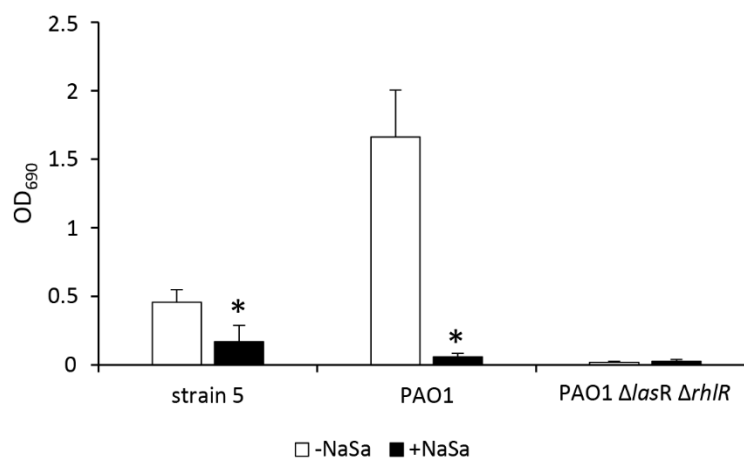

**Figure S3.** NaSa reduces pyocyanin production in serum-containing broth culture of strain 5 and PAO1, but not of PAO1 PAO1 lasR

$\Delta$ rhIR. \* $p < 0.05$  Student's two-sided T-test compared to control (0 mM NaSa).
